# Supplementary material for: Bacterial Genes in the Aphid Genome: Absence of Functional Gene Transfer from Buchnera to Its Host
Source: PLoS Genet. 2010 Feb 26;6(2):e1000827. doi: 10.1371/journal.pgen.1000827 (PMC2829048; doi:10.1371/journal.pgen.1000827)
Supplement: Figure S3 — Alignment of amino acid sequences of DnaEs. Residues conserved in three and two lineages are shaded black and gray, respectively. Triangles and reverse-triangles indicate frameshift deletion and insertion, respectively, in the aphid ψDnaE. Dashes (-) indicate alignment gaps. Asterisks (*) indicate gaps caused by frameshifts. (0.49 MB PDF) [file pgen.1000827.s003.pdf]

*A. pisum*  $\psi$ DnaE : -----VIRKLV\*\*ETAHKIGLKPIIGTA\*NPFRNLINNELTKILLASTQEGYNNLI : 51  
*Buchnera* str. APS DnaE : MNBPKEFIHPEVHSDYSMIDGLSRPEDLVKKAASLNMPAIAITDYNLYGVIREY--NMAHKIGLKPIIGITVNFPSDLINNQLTKILLASTQEGYNNLI : 98  
*E. coli* DnaE : MSBPRFVHPEVHSDYSMIDGLAKTAPLVKKAALGMPALAITDFINLCGLVKEY--GAGHGAGIKPIVGADFNVQCDLLGDELTHLTIVLANNTGYQNLT : 98

*A. pisum*  $\psi$ DnaE : LLISHTYQKGYNNYVTIMKKWLLKINKINILLSGGCCCEIRKVKLIITYIFIIFY----- : 108  
*Buchnera* str. APS DnaE : LLISRAYQKGYHN-NHVLIEKKWFSEINKGLILLSGGPQEGELGKVLNQSLSLISCSFYQKYFPDSYYLEIFRTNRDNEETYLHAWDLSLSTGVPI : 197  
*E. coli* DnaE : LLISKAYQKGYGA--AGPIIDRDWIELNEGLILLSGGRMCDVGRSLIRNSALVDEWAFYEHEFPDRVFLELIRTCQDEESYLHAWPEAEARGLPV : 196

Figure S3
