# Supplementary material for: Bacterial Genes in the Aphid Genome: Absence of Functional Gene Transfer from Buchnera to Its Host
Source: PubMed Central journal article supplement (PMC2829048; doi:10.1371/journal.pgen.1000827), 2010-02-26
Supplement: pgen.1000827.s001.pdf [file pgen.1000827.s001.pdf]

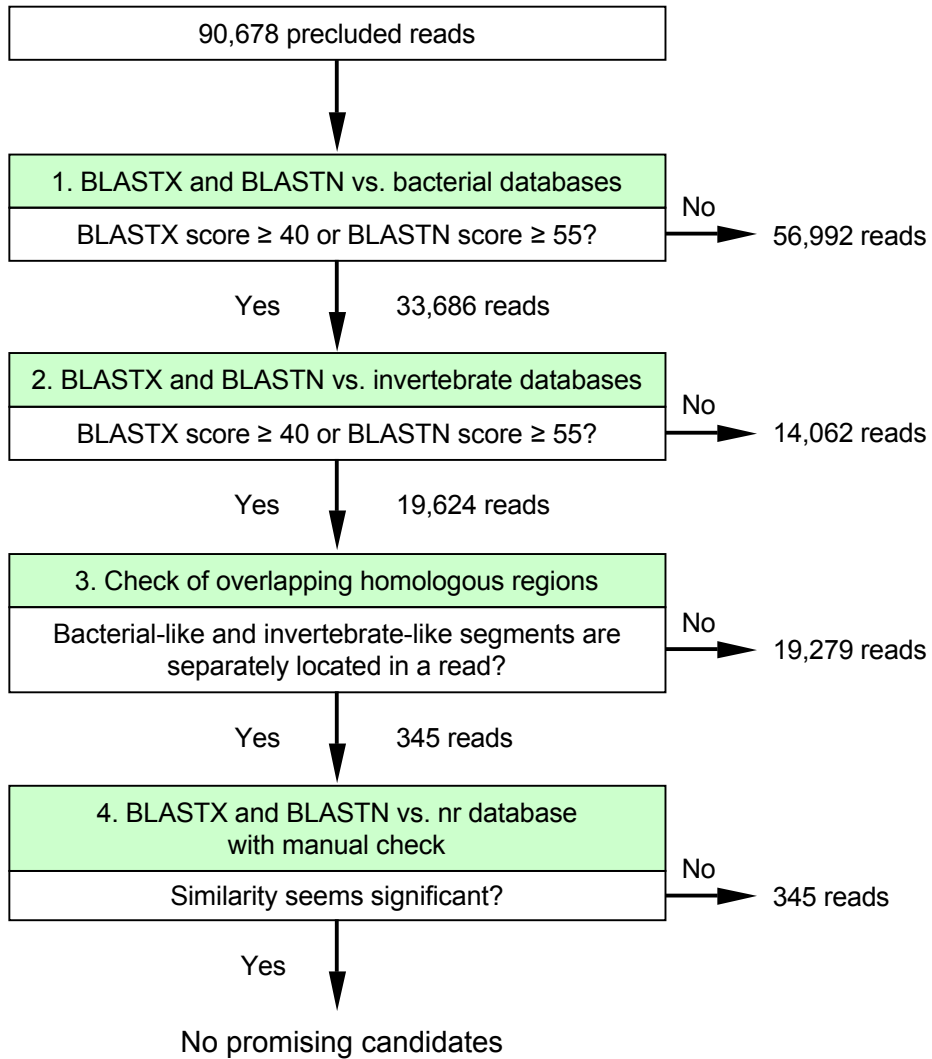

Figure S1
