# Supplementary material for: Bacterial Genes in the Aphid Genome: Absence of Functional Gene Transfer from Buchnera to Its Host
Source: PubMed Central journal article supplement (PMC2829048; doi:10.1371/journal.pgen.1000827), 2010-02-26
Supplement: pgen.1000827.s004.pdf [file pgen.1000827.s004.pdf]

```

A. pisum  $\psi$ AtpH : -----YYRSGSLSPKMLS.VLHSGDINENINLI.LLBNQSKILNK--RFLYLE : 52
Buchnera str. APS AtpH : MSVADTIARPYAQIIEEATENNDEKWKNTLIEIKTASHKKFKNFSGSIEPMLSLPITIGTAFIDENRNLIKLDSNGRENLLNIEEPVYLE : 100
E. coli AtpH : MSEFTIVARPYAKIADDFVVEHQSWERQDMIAAABWTRNEQMAELISGALAEETLAESIEVCEEQLDENGQNLIEVMEENGIDIALPQVLECEELR : 100

```

```

A. pisum  $\psi$ AtpH : ACYKNIIVGLRSAPSLMEKIKIKITLQSLSRKIKYHCLSPDA----- : 97
Buchnera str. APS AtpH : ACYKNIIVQLKSAFSLMENLTKIKVLERFFLKKIKIYKVPNLLNGMIVVNNITFDLSAQNHKQLSLSNF : 177
E. coli AtpH : AVSEATAEVDVLSAALSEQLAKISAAMEKRLSRKVKLNCKIDISVMAEVLIRAGMMIDGVRGRERLAVLOS : 177

```
